# Supplementary material for: Perceptions and Liking Distortion from Information about the Nutritional Upgrades in Biofortified Seafood Products
Source: Foods. 2022 Sep 12;11(18):2808. doi: 10.3390/foods11182808 (PMC9497835; doi:10.3390/foods11182808)
Supplement: Supplementary file 1 [file foods-11-02808-s001.zip › File S1.pdf]

# Flow of the experimental auctions with sensory evaluation Session A-D

| Sequence | Treatment 1 <u>InfoTaste</u>                                                              |                             |                                 | Treatment 2 <u>TasteInfo</u>                                                              |                             |                                 |
|----------|-------------------------------------------------------------------------------------------|-----------------------------|---------------------------------|-------------------------------------------------------------------------------------------|-----------------------------|---------------------------------|
|          | Session A                                                                                 |                             |                                 | Session D                                                                                 |                             |                                 |
| 1        | Instruction and practice round                                                            |                             |                                 | Instruction and practice round                                                            |                             |                                 |
| 2        | Hunger level assessment                                                                   |                             |                                 | Hunger level assessment                                                                   |                             |                                 |
|          | ↓ <i>Randomise</i>                                                                        |                             |                                 | ↓ <i>Randomise</i>                                                                        |                             |                                 |
|          | Trout                                                                                     | Carp                        | Seabream                        | Trout                                                                                     | Carp                        | Seabream                        |
| 3 5 7    | Visual evaluation                                                                         | Visual evaluation           | Visual evaluation               | Visual evaluation                                                                         | Visual evaluation           | Visual evaluation               |
| 4 6 8    | Control bid round                                                                         | Control bid round           | Control bid round               | Control bid round                                                                         | Control bid round           | Control bid round               |
|          | ↓ <i>E</i>                                                                                |                             |                                 | ↓ <i>E</i>                                                                                |                             |                                 |
| 9 11 13  | Info Bid                                                                                  | Info Bid                    | Info Bid                        | Taste Bid                                                                                 | Taste Bid                   | Taste Bid                       |
| 10 12 14 |                                                                                           |                             |                                 |                                                                                           |                             |                                 |
|          | ↓ <i>A</i>                                                                                |                             |                                 | ↓ <i>C</i>                                                                                |                             |                                 |
| 15 17 19 | Taste Bid                                                                                 | Taste Bid                   | Taste Bid                       | Info Bid                                                                                  | Info Bid                    | Info Bid                        |
| 16 18 20 |                                                                                           |                             |                                 |                                                                                           |                             |                                 |
|          | ↓ <i>B</i>                                                                                |                             |                                 | ↓ <i>D</i>                                                                                |                             |                                 |
| 21 23 25 | Reference price Bid                                                                       | Reference price Bid         | Reference price Bid             | Reference price Bid                                                                       | Reference price Bid         | Reference price Bid             |
| 22 24 26 |                                                                                           |                             |                                 |                                                                                           |                             |                                 |
|          | ↓                                                                                         |                             |                                 | ↓                                                                                         |                             |                                 |
| 27 28 29 | Draw bidding round for Salmon                                                             | Draw bidding round for Carp | Draw bidding round for Seabream | Draw bidding round for Salmon                                                             | Draw bidding round for Carp | Draw bidding round for Seabream |
|          | ↓                                                                                         |                             |                                 | ↓                                                                                         |                             |                                 |
| 30       | Questionnaire consumer frequency and socio-demo                                           |                             |                                 | Questionnaire consumer frequency and socio-demo                                           |                             |                                 |
|          | ↓                                                                                         |                             |                                 | ↓                                                                                         |                             |                                 |
| 31       | Each highest bidder for each seafood product purchases the fortified Salmon/Carp/Seabream |                             |                                 | Each highest bidder for each seafood product purchases the fortified Salmon/Carp/Seabream |                             |                                 |

# Flow of the experimental auctions with sensory evaluation Session B-E

| Sequence       | Treatment 1 <u>InfoTaste</u>                                                              | Treatment 2 <u>TasteInfo</u>                                                              |
|----------------|-------------------------------------------------------------------------------------------|-------------------------------------------------------------------------------------------|
|                | Session B                                                                                 | Session E                                                                                 |
| 1              | Instruction and practice round                                                            | Instruction and practice round                                                            |
| 2              | Hunger level assessment                                                                   | Hunger level assessment                                                                   |
|                | ↓ <i>Randomise</i>                                                                        | ↓ <i>Randomise</i>                                                                        |
|                | Carp      Seabream      Trout                                                             | Carp      Seabream      Trout                                                             |
| 3    5    7    | Visual evaluation                                                                         | Visual evaluation                                                                         |
| 4    6    8    | Control bid round                                                                         | Control bid round                                                                         |
|                | ↓                                                                                         | ↓                                                                                         |
| 9    11    13  | Info Bid                                                                                  | Taste Bid                                                                                 |
| 10    12    14 | Info Bid                                                                                  | Taste Bid                                                                                 |
|                | ↓                                                                                         | ↓                                                                                         |
| 15    17    19 | Taste Bid                                                                                 | Info Bid                                                                                  |
| 16    18    20 | Taste Bid                                                                                 | Info Bid                                                                                  |
|                | ↓                                                                                         | ↓                                                                                         |
| 21    23    25 | Reference price Bid                                                                       | Reference price Bid                                                                       |
| 22    24    26 | Reference price Bid                                                                       | Reference price Bid                                                                       |
|                | ↓                                                                                         | ↓                                                                                         |
| 27    28    29 | Draw bidding round for Carp → Seabream → Salmon                                           | Draw bidding round for Carp → Seabream → Salmon                                           |
| 30             | Questionnaire consumer frequency and socio-demo                                           | Questionnaire consumer frequency and socio-demo                                           |
| 31             | Each highest bidder for each seafood product purchases the fortified Carp/Seabream/Salmon | Each highest bidder for each seafood product purchases the fortified Carp/Seabream/Salmon |

Flow of the experimental auctions with sensory evaluation Session C-F

| Sequence       | Treatment 1 <u>InfoTaste</u>                                                                  | Treatment 2 <u>TasteInfo</u>                                                                  |
|----------------|-----------------------------------------------------------------------------------------------|-----------------------------------------------------------------------------------------------|
|                | Session C                                                                                     | Session F                                                                                     |
| 1              | Instruction and practice round                                                                | Instruction and practice round                                                                |
| 2              | Hunger level assessment                                                                       | Hunger level assessment                                                                       |
|                | ↓ <i>Randomise</i>                                                                            | ↓ <i>Randomise</i>                                                                            |
|                | Seabream      Trout      Carp                                                                 | Seabream      Trout      Carp                                                                 |
| 3    5    7    | Visual evaluation                                                                             | Visual evaluation                                                                             |
| 4    6    8    | Control bid round                                                                             | Control bid round                                                                             |
|                | ↓ <i>E</i>                                                                                    | ↓ <i>E</i>                                                                                    |
| 9    11    13  | Info Bid                                                                                      | Taste Bid                                                                                     |
| 10    12    14 | Info Bid                                                                                      | Taste Bid                                                                                     |
|                | ↓ <i>A</i>                                                                                    | ↓ <i>C</i>                                                                                    |
| 15    17    19 | Taste Bid                                                                                     | Info Bid                                                                                      |
| 16    18    20 | Taste Bid                                                                                     | Info Bid                                                                                      |
|                | ↓ <i>B</i>                                                                                    | ↓ <i>D</i>                                                                                    |
| 21    23    25 | Reference price Bid                                                                           | Reference price Bid                                                                           |
| 22    24    26 | Reference price Bid                                                                           | Reference price Bid                                                                           |
|                | ↓                                                                                             | ↓                                                                                             |
| 27    28    29 | Draw bidding round for Seabream → Draw bidding round for Salmon → Draw bidding round for Carp | Draw bidding round for Seabream → Draw bidding round for Salmon → Draw bidding round for Carp |
| 30             | Questionnaire consumer frequency and socio-demo                                               | Questionnaire consumer frequency and socio-demo                                               |
| 31             | Each highest bidder for each seafood product purchases the fortified Seabream/Salmon/Carp     | Each highest bidder for each seafood product purchases the fortified Seabream/Salmon/Carp     |

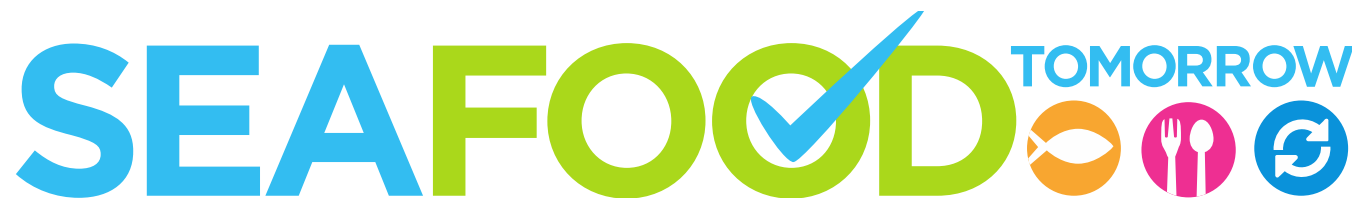

**WELCOME to this experiment!**  
**UGent/CBHU/Aeiforia**

Researchers: (fill-in the names of the involved  
researchers at your institution)

# Instructions

- Thank you for choosing to participate in our experiment on how people make food choices.
- Please read carefully all the instructions that will appear on the screen.
- There is **no right or wrong answer** in any question, we just want to know your opinion.
- Because we are trying to find out the value for the food products, it is very important **not to communicate with any other participant** for any reason. Any attempt to communicate with each other will result in the failure of this experiment.

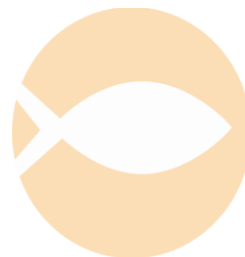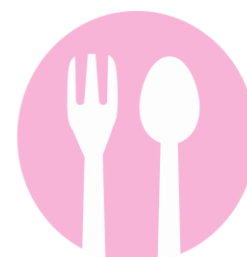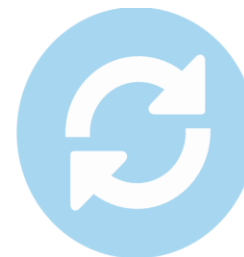

# Instructions

- Today we will auction some seafood products. In a while you will receive details on how an auction works.
- Your participation in the experiment will be rewarded with the amount of € \_\_. This money is yours to use as you wish. We will also give you the opportunity to buy some food products during the auctions that are about to follow.
- This study is **not hypothetical and not just a game**, you should know that if you are the **highest bidder** in an auction you will **have to pay for the product** you bid.



# How does the auction work?

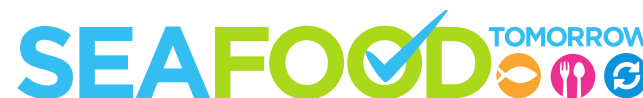

- **Step 1.** You will first examine the food products we are about to auction.
- **Step 2.** Each one of you, will submit a bid for each food product in the appropriate field on the paper.
- **Step 3.** We will rank bids from the highest to the lowest.
- **Step 4.** The person that submits the highest bid wins the auction but will pay the price of the second highest bidder. In case of ties, the highest bidder would be selected randomly.

# How does the auction work?

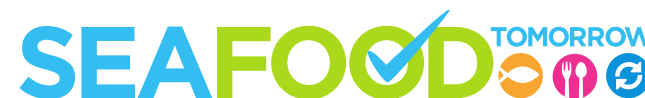

- In this type of auction, it is always in your best interest to submit **bids exactly equal to your valuation for the product**. If you submit a bid **higher** than your valuation for the product, the second highest price may be higher than what you are willing to pay but **you will still need to pay for it**.
- In addition, you do not gain by submitting bids **lower** than your true willingness to pay. This is because the highest bidder generally **does not pay the amount he/she offers**, but the price submitted by the second highest bidder. Besides, this also **reduces your chance** of obtaining the product. Therefore, you should always **submit bids that are exactly equal to the price you want to pay for the product**.

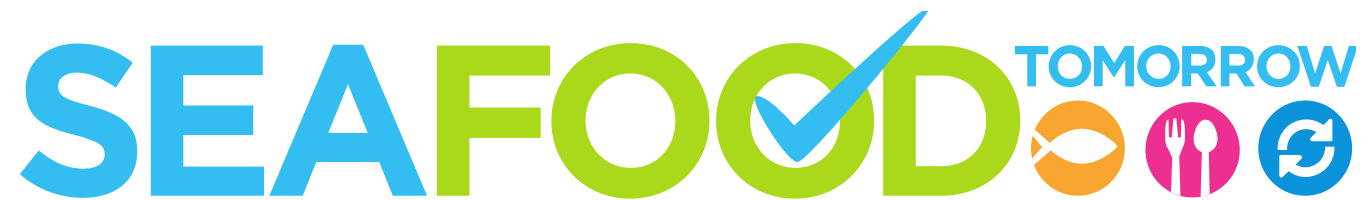

## Visual evaluation

# Visual evaluation

ID \_\_\_\_\_ Groep \_\_\_\_\_

## Bid Sheet

### Visual evaluation

The most I am willing to pay for ...

... Trout 842 is \_\_\_\_\_ €

... Trout 199 is \_\_\_\_\_ €

# Visual evaluation

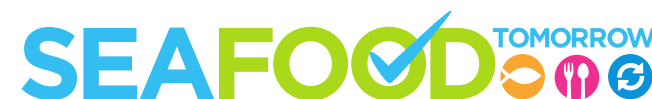

ID \_\_\_\_\_ Groep \_\_\_\_\_

## Bid Sheet

### Visual evaluation

The most I am willing to pay for ...

... Carp 524 is \_\_\_\_\_ €

... Carp 246 is \_\_\_\_\_ €

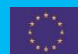

# Visual evaluation



ID \_\_\_\_\_ Groep \_\_\_\_\_

## Bid Sheet

### Visual evaluation

The most I am willing to pay for ...

... Seabream 902 is \_\_\_\_\_ €

... Seabream 734 is \_\_\_\_\_ €

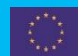



## Information

# Information



- Trout

The differences between the two products are as follows:

**Trout 842** is the **conventional trout fillet** that you can find in the market. **Trout 199** is a **biofortified Trout** that contains **higher levels of Iodine and Selenium** compared to trout 842. These higher levels are obtained during production of the trout by adding 3% seaweed to conventional feed to enrich Iodine and Selenium levels in the seafood products. This biofortified trout has the goal **to improve and to respond better to specific needs of the consumers.**

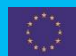

# Information

ID \_\_\_\_\_ Groep \_\_\_\_\_

## Bid Sheet

### Information

The most I am willing to pay for ...

... Trout 842 is \_\_\_\_\_ €

... Trout 199 is \_\_\_\_\_ €

# Information



- **Carp**

The differences between the two products are as follows:

**Carp 246** is the **conventional carp fillet** that you can find in the market. **Carp 524** is a **biofortified carp** that contains **higher levels of Iodine, Selenium and Omega-3 fatty acids** compared to carp 246. These higher levels are obtained during production of the carp by adding 0,5% algae, 0.03% selenised yeast, 6.1 salmon oil to conventional feed to enrich Iodine, Selenium and Omega-3 fatty acids levels in the seafood products. This biofortified carp has the goal **to improve and to respond better to specific needs of the consumers.**



# Information



ID \_\_\_\_\_ Groep \_\_\_\_\_

## Bid Sheet

### Information

The most I am willing to pay for ...

... Carp 524 is \_\_\_\_\_ €

... Carp 246 is \_\_\_\_\_ €



# Information



- Seabream

The differences between the two products are as follows:

**Seabream 902** is the **conventional seabream** that you can find in the market. **Seabream 734** is a **biofortified seabream** that contains **higher levels of Iodine and Selenium** compared to seabream 902. These higher levels are obtained during production of the seabream by adding 0,5% macroalgae and 0,03% selenised-yeast to the feed to enrich Iodine and Selenium levels in the seafood products. This biofortified seabream has the goal **to improve and to respond better to specific needs of the consumers.**

# Information



ID \_\_\_\_\_ Groep \_\_\_\_\_

## Bid Sheet

### Information

The most I am willing to pay for ...

... Seabream 902 is \_\_\_\_\_ €

... Seabream 734 is \_\_\_\_\_ €



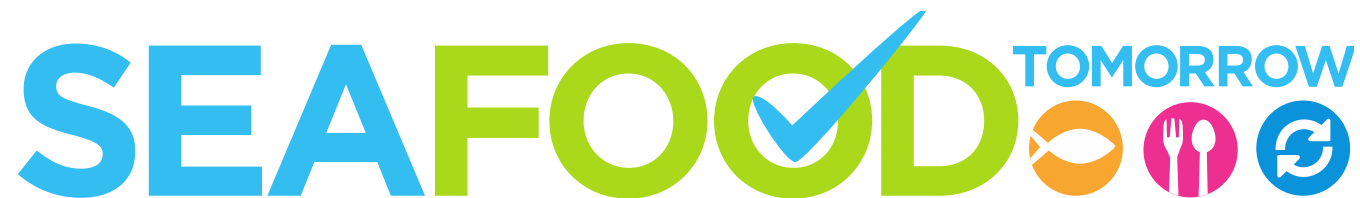

## Sensory evaluation

# Sensory evaluation

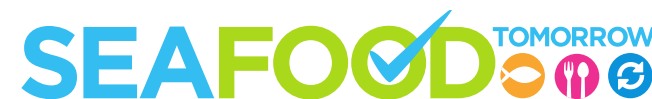

ID \_\_\_\_\_ Groep \_\_\_\_\_

## Bid Sheet

### Sensory evaluation

The most I am willing to pay for ...

... Trout 842 is \_\_\_\_\_ €

... Trout 199 is \_\_\_\_\_ €



# Sensory evaluation

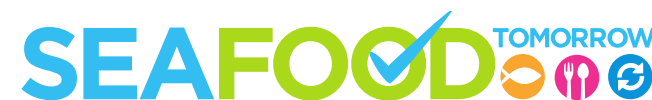

ID \_\_\_\_\_ Groep \_\_\_\_\_

## Bid Sheet

### Sensory evaluation

The most I am willing to pay for ...

... Carp 524 is \_\_\_\_\_ €

... Carp 246 is \_\_\_\_\_ €



# Sensory evaluation



ID \_\_\_\_\_ Groep \_\_\_\_\_

## Bid Sheet

### Sensory evaluation

The most I am willing to pay for ...

... Seabream 902 is \_\_\_\_\_ €

... Seabream 734 is \_\_\_\_\_ €



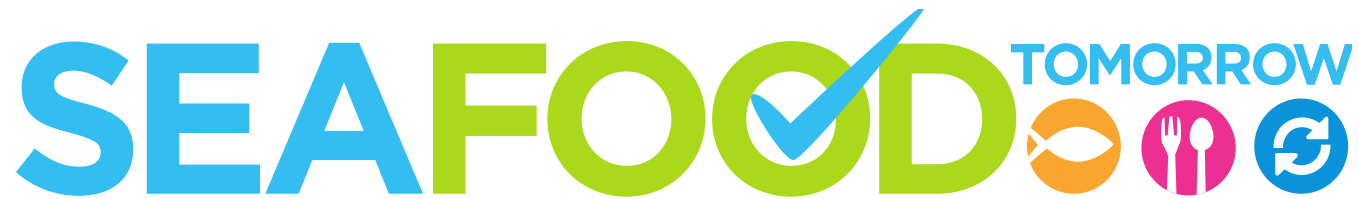

**Thank you for your participation!**

E-mail address & contact info main researcher
